# Supplementary material for: Temperature-directed synthesis of N-doped carbon-based nanotubes and nanosheets decorated with Fe (Fe3O4, Fe3C) nanomaterials
Source: Royal Society of Chemistry journal article supplement (doi:10.1039/c9nr01601e), 2019-01-01
Supplement: c9nr01601e1.pdf [file c9nr01601e1.pdf]

## Supporting Information

### **Temperature-directed synthesis of N-doped carbon-based nanotubes and nanosheets decorated with Fe ( $\text{Fe}_3\text{O}_4$ , $\text{Fe}_3\text{C}$ ) nanomaterials**

Jinghua Liu,<sup>a</sup> Xu Kang,<sup>c</sup> Xiong He<sup>a</sup>, Peicheng Wei<sup>a</sup>, Yan Wen<sup>c</sup> and Xin Li<sup>\*a,b</sup>

<sup>a</sup>, MIIT Key Laboratory of Critical Materials Technology for New Energy Conversion and Storage, School of Chemistry and Chemical Engineering, Harbin Institute of Technology, Harbin 150090, China. E-mail: [lixin@hit.edu.cn](mailto:lixin@hit.edu.cn)

<sup>b</sup>, State Key Lab of Urban Water Resource and Environment, Harbin Institute of Technology, Harbin 150090, China

<sup>c</sup>, School of Environment, Harbin Institute of Technology, Harbin 150090, China.

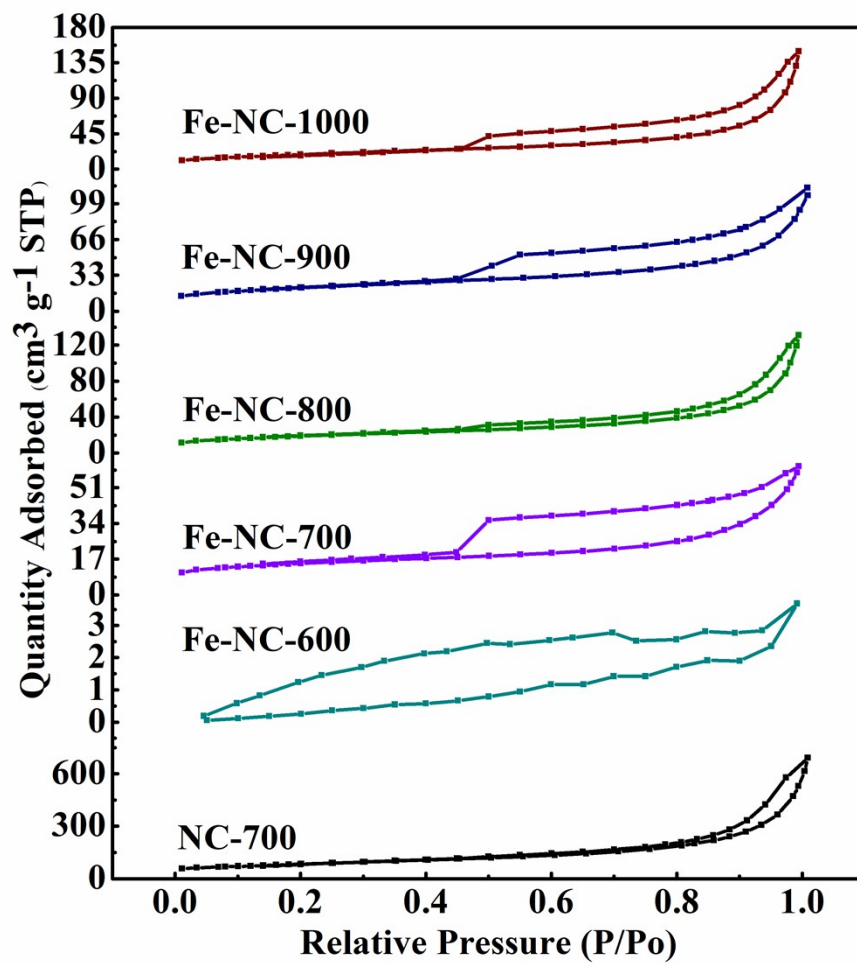

Fig. S1 Nitrogen adsorption/desorption isotherms of NC-700 and Fe-NC-Ts.

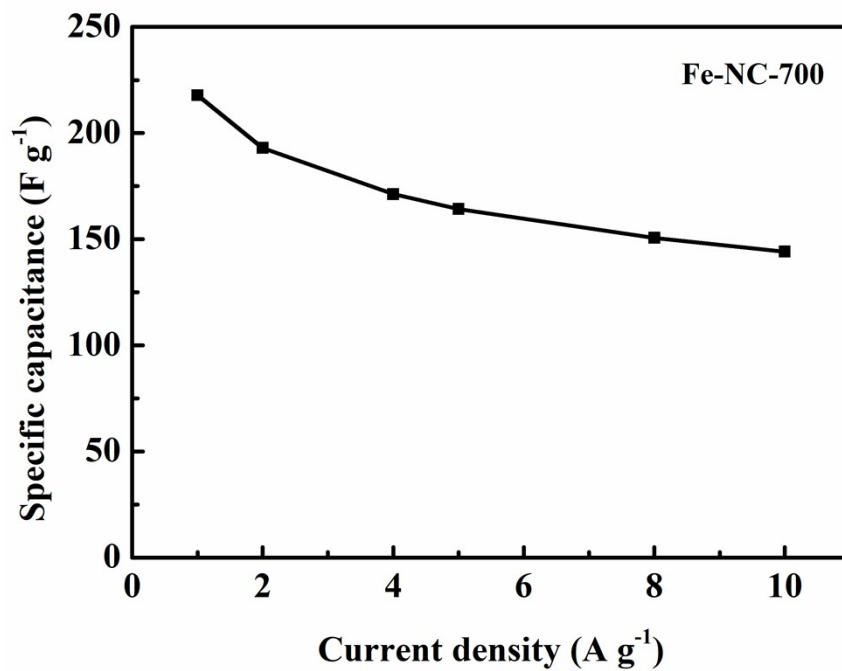

Fig. S2 Relationship between the specific capacitance versus current densities of Fe-NC-700.

**Table S1** Summary of the recently reported iron oxides, iron carbides, iron/carbon hybrids and their electrochemical stabilities in three-electrode configurations.

| Materials                                                | $\Delta V$ (V) | Electrolytes | Cycling condition                    | retention |
|----------------------------------------------------------|----------------|--------------|--------------------------------------|-----------|
| NS-Fe <sub>3</sub> O <sub>4</sub> @N-PC <sup>1</sup>     | -0.1 - 0.6     | 1M KOH       | 5000 cycles at 4 A g <sup>-1</sup>   | 78.2%     |
| Fe <sub>3</sub> O <sub>4</sub> /RGO <sup>2</sup>         | -1 - 0         | 1 M KOH      | 1000 cycles at 10 A g <sup>-1</sup>  | 79.2%     |
| FeO <sub>x</sub> -CNFs <sup>3</sup>                      | -1.2 - 0.1     | 6 M KOH      | 5000 cycles at 1 A g <sup>-1</sup>   | 82%       |
| Fe <sub>3</sub> O <sub>4</sub> /Fe-CNTs <sup>4</sup>     | 0 - 0.5        | 3 M KOH      | 1000 cycles at 1 A g <sup>-1</sup>   | 82.1%     |
| Fe <sub>3</sub> O <sub>4</sub> /3D-graphene <sup>5</sup> | 0 - 0.4        | 3 M KOH      | 5000 cycles at 1 A g <sup>-1</sup>   | 88%       |
| NC/Fe/Fe <sub>3</sub> C <sup>6</sup>                     | -1 - 0         | 6 M KOH      | 4000 cycles at 2 A g <sup>-1</sup>   | 90.7%     |
| NC/Fe <sub>3</sub> C <sup>7</sup>                        | -1 - 0         | 6 M KOH      | 5000 cycles at 1 A g <sup>-1</sup>   | 92%       |
| Fe <sub>3</sub> O <sub>4</sub> /Fe/C <sup>8</sup>        | -1.1 - 0.1     | 6 M KOH      | 1000 cycles at 3 A g <sup>-1</sup>   | 94%       |
| Fe-NC-700 (this work)                                    | -1 - 0.2       | 6 M KOH      | 10000 cycles at 10 A g <sup>-1</sup> | 82.1%     |
| Fe-NC-800 (this work)                                    | -1.0 - 0.2     | 6 M KOH      | 10000 cycles at 10 A g <sup>-1</sup> | 91.3%     |

## References

1. M. Zhu, Q. Chen, J. Tang, W. Wei and S. Li, *Applied Surface Science*, 2019, **480**, 582-592.
2. L. Li, P. Gao, S. Gai, F. He, Y. Chen, M. Zhang and P. Yang, *Electrochimica Acta*, 2016, **190**, 566-573.
3. R. Pai, A. Singh, S. Simotwo and V. Kalra, *Adv. Eng. Mater.*, 2018, **20**, 1701116.
4. J. Sun, P. Zan, X. Yang, L. Ye and L. Zhao, *Electrochimica Acta*, 2016, **215**, 483-491.
5. X. Zhao, Y. Jia and Z.-H. Liu, *Journal of colloid and interface science*, 2019, **536**, 463-473.
6. G. Li, J. Zhang, W. Li, K. Fan and C. Xu, *Nanoscale*, 2018, **10**, 9252-9260.
7. J. Zhu, D. Xu, C. Wang, W. Qian, J. Guo and F. Yan, *Carbon*, 2017, **115**, 1-10.
8. B. Devi, M. Venkateswarulu, H. S. Kushwaha, A. Halder and R. R. Koner, *Chemistry–A European Journal*, 2018, **24**, 6586-6594.
